# Supplementary material for: Urban Forest Quality Corresponds with Soil Microbial Community Composition and Arbuscular Fungi Root Colonization
Source: Research Square preprint supplement (doi:10.21203/rs.3.rs-5790707/v1), 2025-01-13
Supplement: Supplementary file 1 [file 9ebb8a73876c4104a6aac954.docx]

**Urban Forest Quality Corresponds with Soil Microbial Community Composition and Arbuscular Fungi Root Colonization**

**Lindsay W. Gaimaro1,2, Humberto Castillo Gonzalez3, Stephanie Yarwood1***

1 Environmental Science and Technology Department, University of Maryland, College Park, MD

2 United States Army, Engineer Research Development Center, Cold Regions Research and Engineering Laboratory, Hanover, NH

3 Université de Franche-Comté, CNRS, CHRONO-E (UMR 6249), F-25200 Montbéliard, France

**Supplemental**

**Table S1.** Plot information, including the number of tree species, the dominant tree species, and average tree height. Note: fine root samples used to quantify AMF were sampled mainly from *Acer* trees. Dotted lines separated high-, mid- and low- quality groupings.

| **Sample Number** | **Quality**  Score | **Number of Tree Species** | **Dominant Tree Genus per plot** | **Average Tree Height** | **Tree sampled for AMF** |
| --- | --- | --- | --- | --- | --- |
| 1 | 69.5 | 13 | *Quercus* | 39.3 | *Acer* |
| 2 | 72 | 7 | *Quercus* | 42.4 | *Acer* |
| 3 | 69.5 | 6 | *Liriodendron* | 34.2 | *Acer* |
| 4 | 73.5 | 6 | *Quercus* | 55.1 | *Acer* |
| 5 | 71.5 | 8 | *Liriodendron* | 63.5 | *Acer* |
| 6 | 69.5 | 8 | *Quercus* | 51.3 | *Fagus* |
| 7 | 71 | 6 | *Quercus* | 50.5 | *Acer* |
| 8 | 74 | 13 | *Liriodendron* | 50.1 | *Acer* |
| 9 | 71.5 | 11 | *Quercus* | 29.4 | *Acer* |
| 10 | 70.5 | 7 | *Quercus* | 46.8 | *Acer* |
| 11 | 67.5 | 11 | *Carya* | 48.3 | *Acer* |
| 12 | 58.5 | 19 | *Quercus* | 43.2 | *Acer* |
| 13 | 62 | 11 | *Quercus* | 27.0 | *Acer* |
| 14 | 63.5 | 5 | *Quercus* | 47.1 | *Acer* |
| 15 | 61.5 | 8 | *Acer* | 49.9 | *Acer* |
| 16 | 54.5 | 3 | *Acer* | 49.8 | *Acer* |
| 17 | 52.5 | 5 | *Platanus* | 56.3 | *Acer* |
| 18 | 64 | 9 | *Quercus* | 48.7 | *Acer* |
| 19 | 47.5 | 12 | *Quercus* | 25.5 | *Juglans* |
| 20 | 41.5 | 3 | *Platanus* | 38.5 | *Platanus* |
| 21 | 42.5 | 1 | *Acer* | 29.0 | *Acer* |
| 22 | 39 | 3 | *Liriodendron* | 68.0 | *Acer* |
| 23 | 41.5 | 9 | *Liriodendron* | 50.8 | *Acer* |
| 24 | 39.5 | 6 | *Liriodendron* | 49.0 | *Acer* |
| 25 | 42.5 | 6 | *Acer* | 24.2 | *Acer* |
| 26 | 41 | 9 | *Acer* | 45.2 | *Acer* |


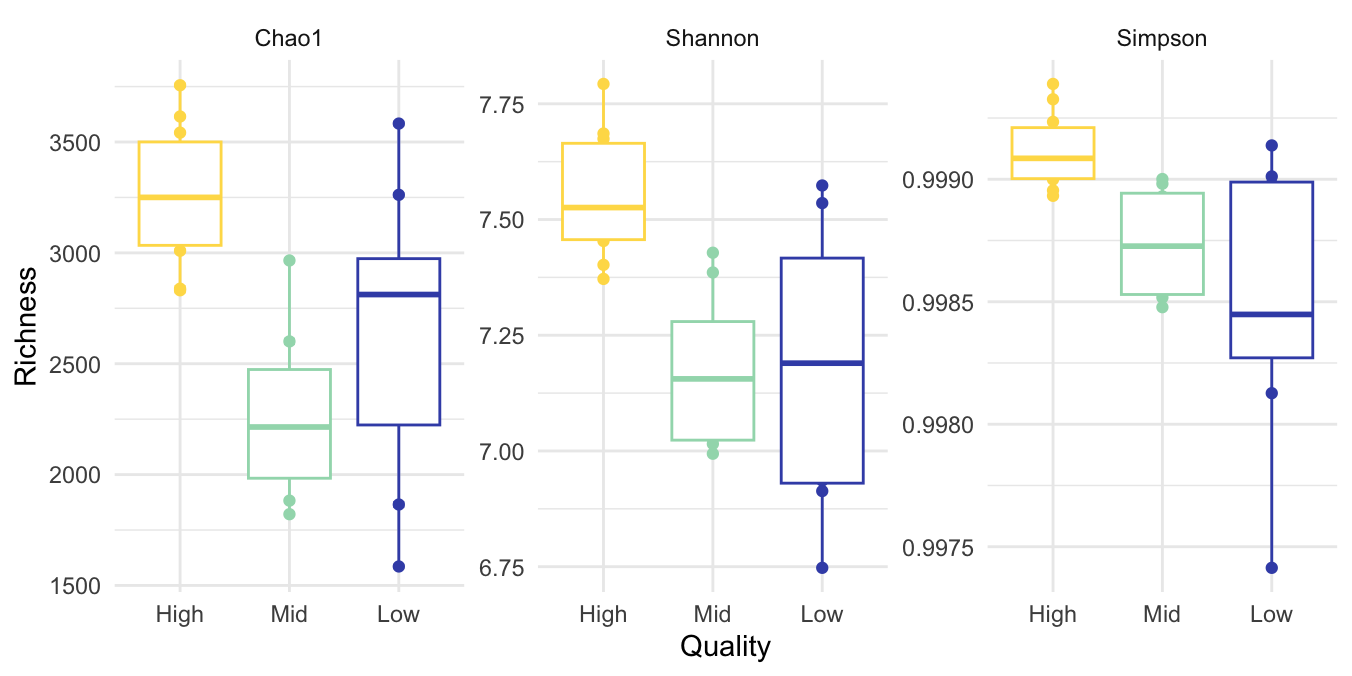


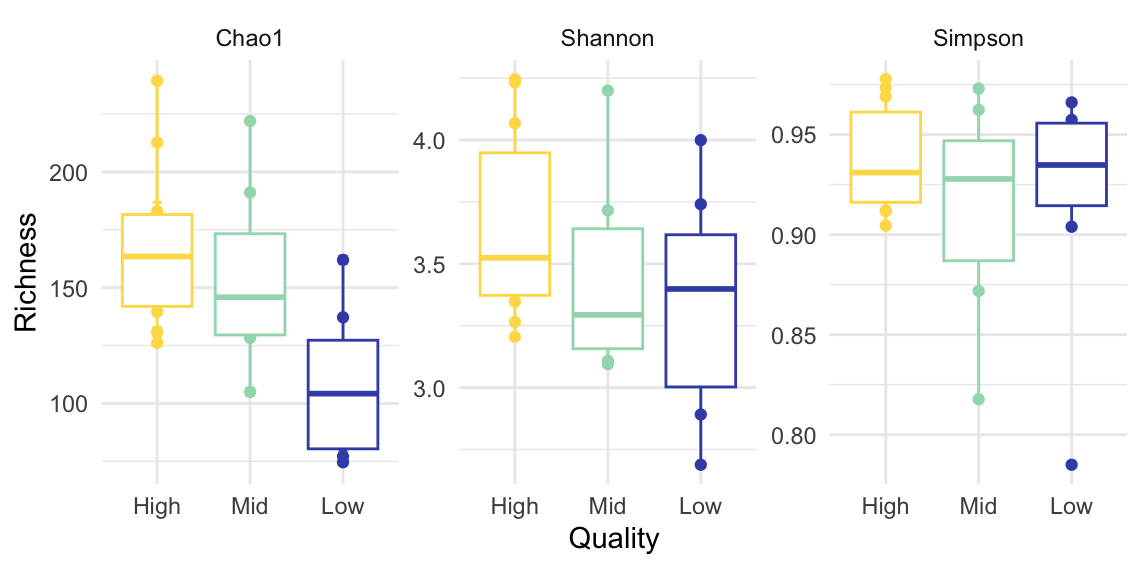
16S

ITS

**Figure S1**. Alpha diversity indices for 16S rRNA DNA and ITS gene sequences.


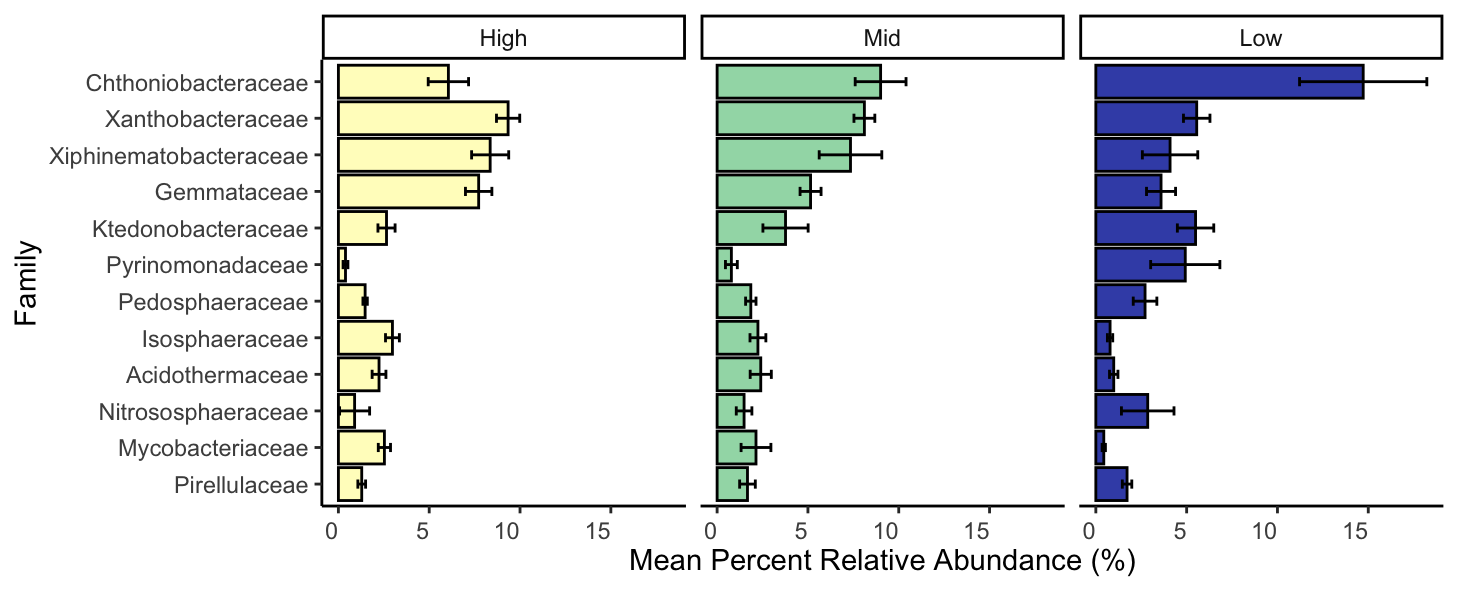


**Figure S2.** Most abundant putatively identified families based on 16S rRNA gene sequences relative abundance.


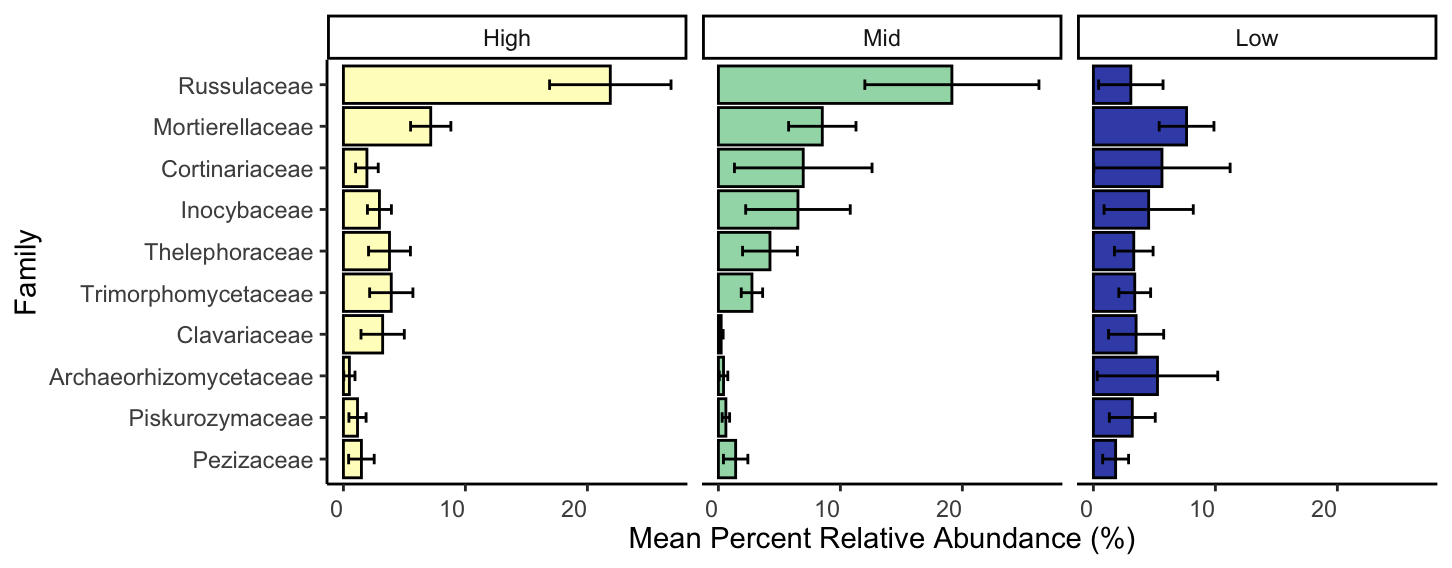


**Figure S3**. Most abundant putatively identified families based on fungal ITS gene sequences relative abundance.

| **Target** | **Primers & References**  (Forward / Reverse) |  | **Primer sequence** | **Plasmid Standard Origin** | **Primers & References**  (Forward / Reverse) | **Thermocycler Conditions**  (Acquisition Step Bolded) | **Number of Cycles** | **Plasmid standard and soil correction efficiency (%) (r2 values)** |
| --- | --- | --- | --- | --- | --- | --- | --- | --- |
| Bacteria and Archaea16S rRNA gene V4 region  Fungal ITS | F515 and R806  ITS1F  ITS 2R |  | GTGCCAGCMGCCGCGGTAA & GACTACVSGGGTATCTAAT  CTTGGTCATTTAGAGGAAGTAA &  CTGCGTTCTTCATCGATGC | *Escherichia coli*    *Haematonecretia haematococca* | EUB338  EUB518 ( Caporaso et al, 2010)  ITS1F  ITS 5.8S ( Caporaso et al, 2010) | 95°C for 5 min  95°C for 5 s / 55°C for 15 s / **72°C for 10 s**  95°C for 5 min  95°C for 5 s / 55°C for 15 s / **72°C for 10 s** | 1  40  1  40 | 99%, soil = 83 %  All r2 = 93%  93%, soil = 93%  All r2 =99 except  “}\soil r2 = 87% |

**Table S2.** Primers used in amplicon sequencing and qPCR, including qPCR reaction conditions and efficiency statistics.

**
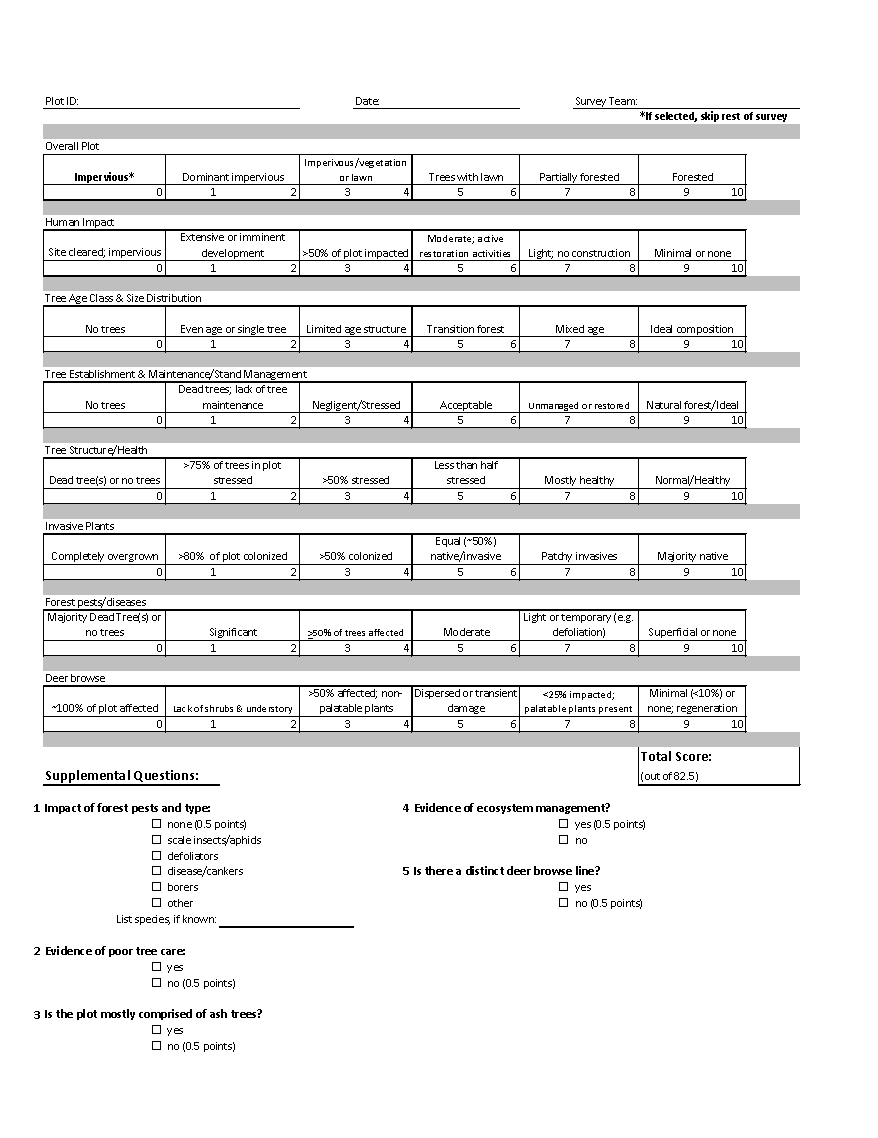
**

**Figure S4**. Fairfax plot health variable data sheet created by the Urban Forest Management Division of Fairfax County, VA. Scores from each section are totaled with a max score of 82.5 for each i-Tree Eco plot. A high score in each section is deemed as a higher quality forested stand, less impacted by urbanization.
